# Supplementary material
Source: PubMed Central journal article supplement (PMC5552068)
Supplement: NIHMS888051-supplement-supplement1.pdf [file NIHMS888051-supplement-supplement1.pdf]

**Table S1 - Characteristics of individual studies in the International Head and Neck Cancer Epidemiology (INHANCE) Consortium pooled data including dietary information.**

| Study                | Recruitment period | Source (cases/controls)                                       | Participation rate, % (cases/controls) | Age eligibility (years) | Number of subjects (cases/ controls) | Questionnaire, administration, reference period for the recall         | Frequency  | Serving size <sup>a</sup> | # Food items (including non-alcoholic beverages)   | Condiments | Information on carotenoids                                                                   |
|----------------------|--------------------|---------------------------------------------------------------|----------------------------------------|-------------------------|--------------------------------------|------------------------------------------------------------------------|------------|---------------------------|----------------------------------------------------|------------|----------------------------------------------------------------------------------------------|
| Italy Multicenter    | 1990-1999          | Hospital/Hospital - unhealthy                                 | >95/>95                                | 18-80                   | 1261/2716                            | FFQ, interviewer-administered, 2 year before disease                   | Raw data   | S/M/L                     | 78 (including 6 non-alcoholic beverages)           | 12         | β-carotene equivalents, β-cryptoxanthin, Lycopene, Lutein plus zeaxanthin, Total carotenoids |
| Switzerland          | 1991-1997          | Hospital/Hospital-unhealthy                                   | >95/>95                                | <80                     | 516/883                              | FFQ, interviewer-administered, 2 year before disease                   | Raw data   | S/M/L                     | 78 (including 6 non-alcoholic beverages)           | 12         | β-carotene equivalents, β-cryptoxanthin, Lycopene, Lutein plus zeaxanthin, Total carotenoids |
| Los Angeles, CA, USA | 1999-2004          | Cancer registry/ Neighborhood                                 | 49/68                                  | 18-65                   | 417/1005                             | FFQ, interviewer-administered, during the past year                    | Raw data   | M                         | 73 (including 11 non-alcoholic beverages)          | 12         | β-cryptoxanthin, Lycopene, Lutein plus zeaxanthin, Total carotenoids                         |
| Boston, MA, USA      | 1999-2004          | Hospital/ Residential records                                 | 88.7/48.7                              | ≥18                     | 584/659                              | FFQ, self-administered, during the past year                           | Categories | M                         | 129 (including 12 non-alcoholic beverages)         | 18         | β-cryptoxanthin, Lycopene, Lutein plus zeaxanthin, Total carotenoids                         |
| New York, MSKCC, USA | 1992-1994          | Hospital/Blood donors                                         | NA                                     | NA                      | 134/169                              | FFQ–diet history, self-administered, during the past year <sup>c</sup> | Raw data   | S/M/L                     | 88 (including 5 non-alcoholic beverages)           | 6          | β-cryptoxanthin, Lycopene, Lutein plus zeaxanthin, Total carotenoids                         |
| Milan, Italy         | 2006-2009          | Hospital/Hospital-unhealthy                                   | >95/>95                                | 18-80                   | 367/750                              | FFQ, interviewer-administered, 2 years before disease                  | Raw data   | S/M/L                     | 78 (including 6 non-alcoholic beverages)           | 12         | β-carotene equivalents, β-cryptoxanthin, Lycopene, Lutein plus zeaxanthin, Total carotenoids |
| Buffalo, NY, USA     | 1982-1998          | Hospital/Hospital                                             | ~50/~50                                | NA                      | 632/1254                             | FFQ, self-administered, during the past few years                      | Categories | M                         | 56 (including 12 non-alcoholic beverages)          | 4          | β-cryptoxanthin, Lycopene, Lutein plus zeaxanthin, Total carotenoids                         |
| North Carolina, USA  | 2002-2006          | Cancer registry/ DMV files                                    | 82/61                                  | 20-80                   | 1368/1396                            | FFQ, interviewer-administered, during the past year                    | Categories | M                         | 57 (including 5 non-alcoholic beverages) questions | 11         | β-carotene equivalents, β-cryptoxanthin, Lycopene, Lutein plus zeaxanthin, Total carotenoids |
| Japan                | 2001-2005          | Cancer hospital/ Hospital-unhealthy                           | 97/97                                  | 20-79                   | 526/3102                             | FFQ, self-administered, during the past year                           | Categories | NA                        | 51 (including 3 non-alcoholic beverages)           | 3          | β-carotene equivalents                                                                       |
| US Multicenter       | 1983-1984          | Cancer registry/ Random digit dialing and health care rosters | 75/76                                  | 18-79                   | 1114/1268                            | FFQ, interviewer-administered, during the past year                    | Raw data   | S/M/L                     | 84 (including 13 non-alcoholic beverages)          | 9          | β-cryptoxanthin, Lycopene, Lutein plus zeaxanthin, Total carotenoids                         |
