# Supplementary material
Source: PubMed Central journal article supplement (PMC5552068)
Supplement: NIHMS888051-supplement-supplement2.pdf [file NIHMS888051-supplement-supplement2.pdf]

**Table S2 - Pearson correlation coefficients between the putative confounding nutrients considered and individual and combined carotenoids\***

|                             | $\beta$ -carotene equivalents | $\beta$ -cryptoxanthin | Lycopene | Lutein plus zeaxanthin | Total carotenoids |
|-----------------------------|-------------------------------|------------------------|----------|------------------------|-------------------|
| Vitamin C                   | 0.44                          | 0.67                   | 0.14     | 0.28                   | 0.46              |
| Vitamin E                   | 0.41                          | 0.13                   | 0.23     | 0.40                   | 0.47              |
| Monounsaturated fatty acids | 0.20                          | 0.00                   | 0.12     | 0.46                   | 0.25              |
| Polyunsaturated fatty acids | 0.13                          | -0.05                  | 0.13     | 0.00                   | 0.17              |

\*Correlation coefficients were calculated on the study-specific non-alcohol energy-adjusted nutrient intakes.
